# Supplementary material for: Controlled growth of vertical 3D MoS2(1−x)Se2x nanosheets for an efficient and stable hydrogen evolution reaction
Source: Royal Society of Chemistry journal article supplement (doi:10.1039/c6ta07904k), 2016-01-01
Supplement: c6ta07904k1.pdf [file c6ta07904k1.pdf]

## Electronic Supplementary Information (ESI)

### Controlled growth of vertical 3D $\text{MoS}_{2(1-x)}\text{Se}_{2x}$ nanosheets for efficient and stable hydrogen evolution reaction

Xiaoshuang Chen,<sup>ab</sup> Zhiguo Wang,<sup>c</sup> Yunfeng Qiu,<sup>a</sup> Jia Zhang,<sup>a</sup> Guangbo Liu,<sup>a</sup> Wei  
Zheng,<sup>a</sup> Wei Feng,<sup>a</sup> Wenwu Cao,<sup>b</sup> PingAn Hu\*<sup>a</sup> and Wenping Hu\*<sup>bd</sup>

<sup>a</sup>Key Lab of Microsystem and Microstructure of Ministry of Education, Harbin  
Institute of Technology, Harbin 150080, China. E-mail: hupa@hit.edu.cn

<sup>b</sup>Department of Physics, Harbin Institute of Technology, Harbin 150080, China

<sup>c</sup>School of Physical Electronics, Center for Public Security Information and  
Equipment Integration Technology, University of Electronic Science and Technology  
of China, Chengdu, 610054, P.R. China

<sup>d</sup>Key Laboratory of Organic Solids, Institute of Chemistry, Chinese Academy of  
Sciences, Beijing 100190, China. E-mail: huwp@iccas.ac.cn

## Simulation details and methods

All the calculations were performed by using density functional theory (DFT) calculations as implemented in the Vienna *ab initio* package (VASP).<sup>S1</sup> Spin-polarization was considered for all the simulations. The projector augmented wave (PAW) method<sup>S2</sup> was used to describe electron-ion interaction, while the generalized gradient approximation using the Perdew-Burke-Ernzerhof (PBE) functional was used to describe the electron exchange-correlation. A plane wave basis was set up to an energy cut off of 520 eV. A 6×6 supercell of MoS<sub>2(1-x)</sub>Se<sub>2x</sub> monolayer was used to investigate the adsorption of hydrogen. A 25 Å vacuum space was constructed to avoid the periodical image interactions between two adjacent MoS<sub>2(1-x)</sub>Se<sub>2x</sub> layers. The Brillouin zone was integrated using the Monkhorst-Pack scheme<sup>S3</sup> with 3×3×1 *k*-grid. All the atomic positions and cell parameters were relaxed using a conjugate gradient minimization until the force on each atom is less than 0.02 eV Å<sup>-1</sup>.

Gibbs free-energy of the adsorption atomic hydrogen was calculated using equation (1):

$$\Delta G_H^0 = \Delta E_H + \Delta E_{ZPE} - T\Delta S_H \quad (1)$$

Where  $\Delta E_{ZPE}$  and  $\Delta S_H$  are the zero-point energy and entropy difference of hydrogen in the adsorbed state and the gas phase, respectively. The hydrogen adsorption energy  $\Delta E_H$  for hydrogen in prytine MoS<sub>2(1-x)</sub>Se<sub>2x</sub> is calculated with the following expression:

$$\Delta E_H = E_{\text{MoS}_{2(1-x)}\text{Se}_{2x}+\text{H}} - E_{\text{MoS}_{2(1-x)}\text{Se}_{2x}} - \frac{1}{2}E_{\text{H}_2} \quad (2)$$

where  $E_{\text{MoS}_{2(1-x)}\text{Se}_{2x}+\text{H}}$  and  $E_{\text{MoS}_{2(1-x)}\text{Se}_{2x}}$  are the total energies of  $\text{MoS}_{2(1-x)}\text{Se}_{2x}$  with and without hydrogen adsorption, respectively.  $E_{\text{H}_2}$  is the energy of a gas phase hydrogen molecule.

The hydrogen adsorption energy  $\Delta E_H$  for hydrogen adsorbed in  $\text{MoS}_{2(1-x)}\text{Se}_{2x}$  with S and Se vacancies is calculated with the following expression:

$$\Delta E_H = E_{\text{MoS}_{2(1-x)}\text{Se}_{2x}(\text{vac})+\text{H}} - E_{\text{MoS}_{2(1-x)}\text{Se}_{2x}(\text{vac})} - \frac{1}{2}E_{\text{H}_2} \quad (3)$$

where  $E_{\text{MoS}_{2(1-x)}\text{Se}_{2x}(\text{vac})+\text{H}}$  and  $E_{\text{MoS}_{2(1-x)}\text{Se}_{2x}(\text{vac})}$  are the total energies of  $\text{MoS}_{2(1-x)}\text{Se}_{2x}$  with vacancy and with and without hydrogen adsorption, respectively.

The calculated frequencies of  $\text{H}_2$  gas is  $4345 \text{ cm}^{-1}$ ,  $58 \text{ cm}^{-1}$ , and  $42 \text{ cm}^{-1}$ . The contribution from the configurational entropy in the adsorbed state is small and is neglected. So the entropy of hydrogen adsorption as  $\Delta S_H = \frac{1}{2}S_{\text{H}_2}$  where  $S_{\text{H}_2}$  is the entropy of molecule hydrogen in the gas phase at standard conditions.<sup>S4</sup> With these values the Gibbs free energy of equation (1) can be rewritten as:

$$\Delta G_H^0 = \Delta E_H + 0.29 \quad (4)$$

The defect formation energy  $E_f$  of S/Se vacancy was calculated from the following expression:<sup>S5</sup>

$$E_f(\text{Vac}) = E(\text{Vac}) - E(\text{pristine}) + \mu_{\text{S/Se}} \quad (5)$$

where  $E(\text{Vac})$  is the total energy of the supercell containing a relaxed S or Se vacancy,  $E(\text{pristine})$  is the total energy of the same pristine supercell,  $\mu_{\text{S/Se}}$  is the chemical potential of S or Se.

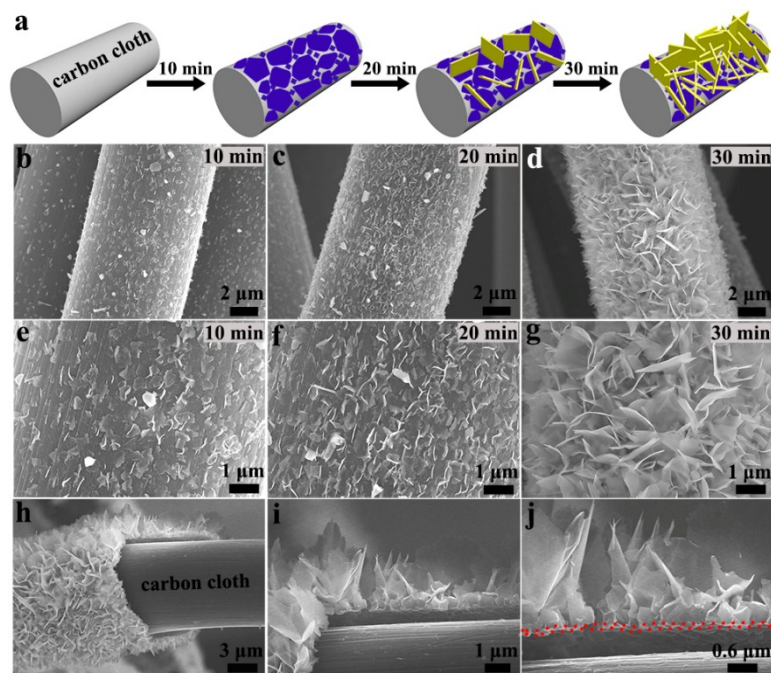

**Fig. S1** (a) schematic diagram, (b-g) different magnification SEM images for growth process of vertically oriented 3D  $\text{MoS}_{2(1-x)}\text{Se}_{2x}$  nanosheets on carbon cloth with different growth time (10, 20, 30 min), (h-j) different magnification side-view SEM images of vertically oriented 3D  $\text{MoS}_{2(1-x)}\text{Se}_{2x}$  nanosheets on the damaged region at the growth time of 30 min.

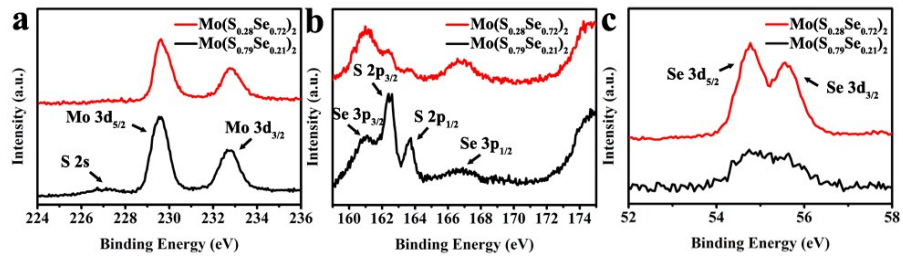

**Fig. S2** XPS spectra of Mo 3d, S 2s, S 2p, Se 3p and Se 3d of vertically oriented 3D Mo(S<sub>0.79</sub>Se<sub>0.21</sub>)<sub>2</sub> and Mo(S<sub>0.28</sub>Se<sub>0.72</sub>)<sub>2</sub> alloy nanosheets.

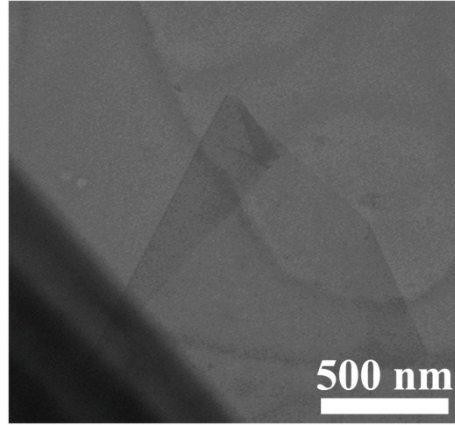

**Fig. S3** Dark-field TEM image of vertically oriented 3D Mo(S<sub>0.53</sub>Se<sub>0.47</sub>)<sub>2</sub> nanosheets.

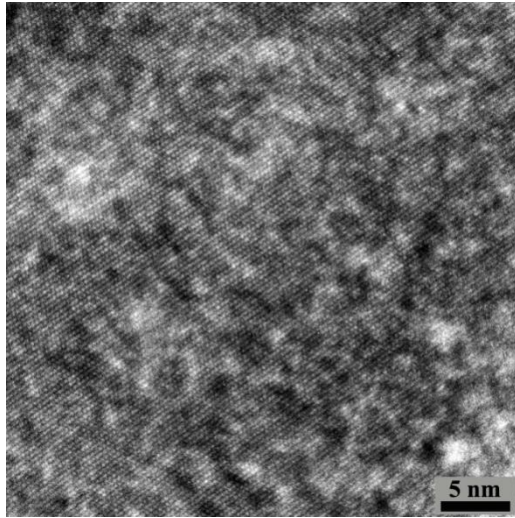

**Fig. S4** Large region HRTEM image of vertically oriented 3D Mo(S<sub>0.53</sub>Se<sub>0.47</sub>)<sub>2</sub> nanosheets.



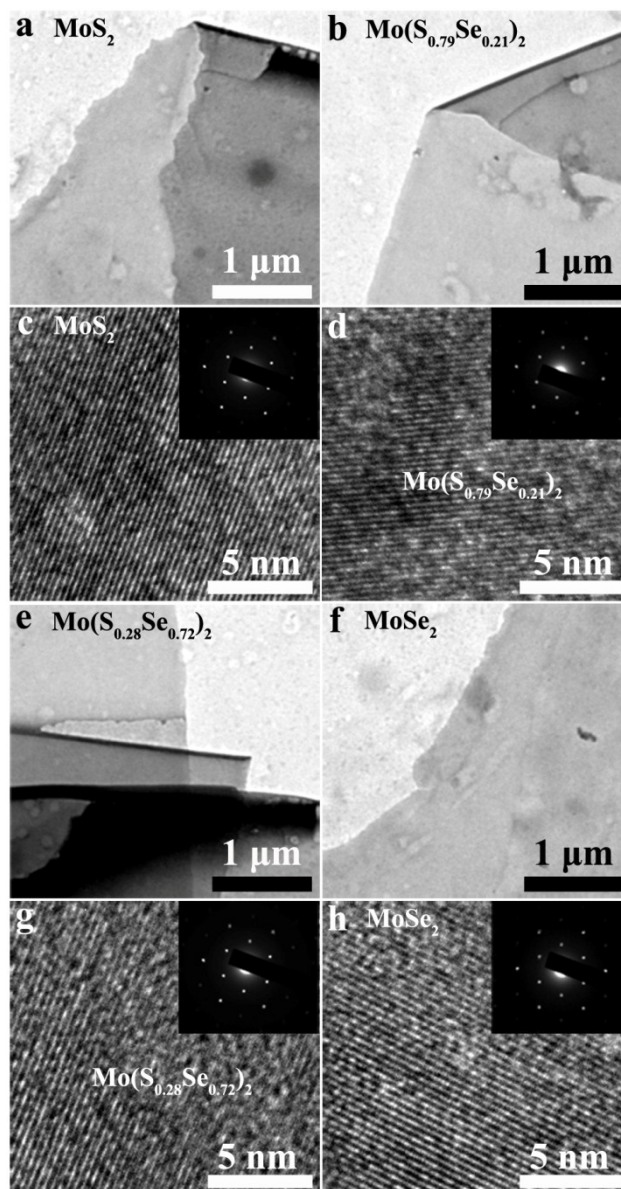

**Fig. S5** TEM, HRTEM images and SAED patterns of vertically oriented 3D (a,c)

MoS<sub>2</sub>, (b,d) Mo(S<sub>0.79</sub>Se<sub>0.21</sub>)<sub>2</sub>, (e,g) Mo(S<sub>0.28</sub>Se<sub>0.72</sub>)<sub>2</sub> and (f,h) MoSe<sub>2</sub> nanosheets.

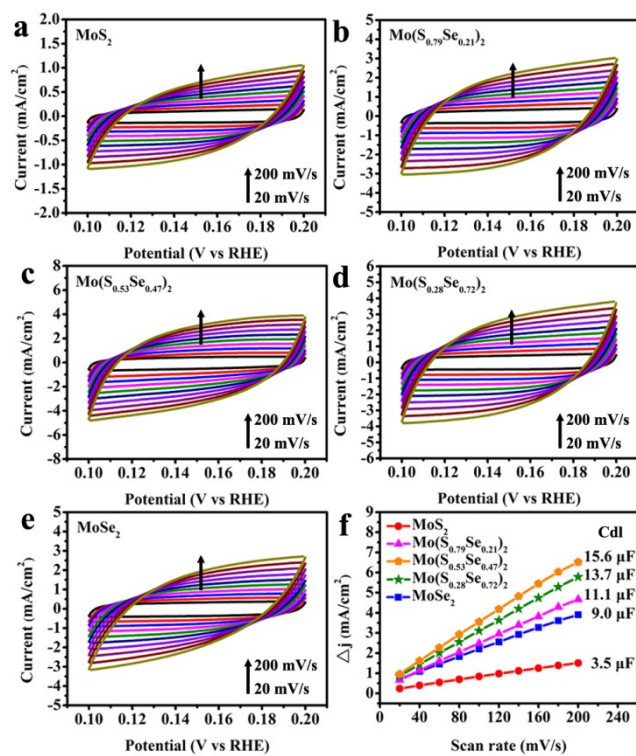

**Fig. S6** Cyclic voltammetry curves of vertically oriented 3D  $\text{MoS}_{2(1-x)}\text{Se}_{2x}$  alloy nanosheets in the potential region of 0.1-0.2 V vs RHE at different scan rate (20, 40, 60  $\text{mV s}^{-1}$ , etc.), (b) The current density variation  $\Delta j$  at 0.15 V vs RHE plotted against scan rate linearly fitted to acquire  $C_{dl}$ .

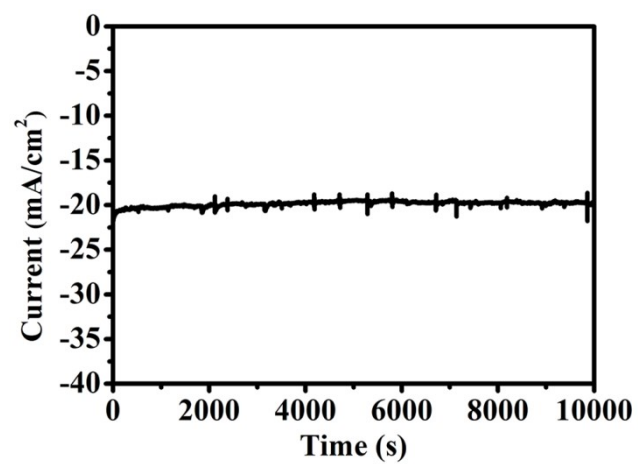

**Fig. S7** Chronoamperometric curve of vertically oriented 3D  $\text{Mo}(\text{S}_{0.53}\text{Se}_{0.47})_2$  nanosheets on carbon cloth under a constant overpotential of 200 mV for 10000s.

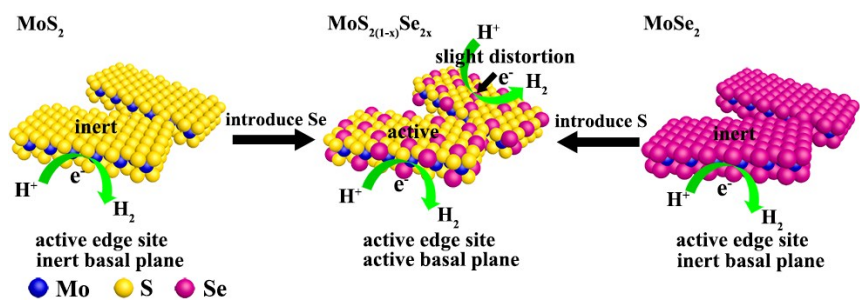

**Fig. S8** Schematic illustration of HER electrocatalytic activity for vertically oriented 3D  $\text{MoS}_{2(1-x)}\text{Se}_{2x}$  nanosheets.

**Table S1** Comparison of previous reported MoS<sub>2</sub> and MoSe<sub>2</sub> based HER electrocatalysts and our electrocatalyst.

| Catalyst                               | Morphology         | Onset potential<br>$\eta_0$ (mV) | $\eta_{10}$<br>(mV) | Tafel slope<br>(mV dec <sup>-1</sup> ) | Ref.         |
|----------------------------------------|--------------------|----------------------------------|---------------------|----------------------------------------|--------------|
| MoS <sub>2(1-x)</sub> Se <sub>2x</sub> | vertical nanosheet | 121                              | 183                 | 55.5                                   | Present work |
| 2H MoS <sub>2</sub>                    | nanosheet          | 250                              | -                   | 75-86                                  | S6           |
| 1T MoS <sub>2</sub>                    |                    | 100                              | -                   | 40                                     |              |
| 2H MoS <sub>2</sub>                    | nanosheet          | 200                              | 320                 | 117                                    | 2            |
| 1T MoS <sub>2</sub>                    |                    | 135                              | 187                 | 43                                     |              |
| MoS <sub>2</sub>                       | nanosheet          | 155                              | 195                 | 50                                     | 8            |
| MoS <sub>2</sub>                       | porous film        | -                                | -                   | 41-45                                  | S7           |
| MoS <sub>2</sub>                       | nanosheet          | -                                | -                   | 140-145                                | S8           |
| MoS <sub>2</sub>                       | vertical film      | 200                              | -                   | 86                                     | S9           |
| MoSe <sub>2</sub>                      | vertical film      | 200                              | -                   | 105                                    |              |
| MoSe <sub>2</sub>                      | vertical           | -                                | 250                 | 59.8                                   | 18           |

---

|                                                    |                        |     |     |      |     |
|----------------------------------------------------|------------------------|-----|-----|------|-----|
|                                                    | nanofilm               |     |     |      |     |
| MoSe <sub>2</sub>                                  | macroporous<br>film    | 150 | 250 | 80   | S10 |
| MoSe <sub>2-x</sub>                                | nanosheet              | 170 | 288 | 98   | S11 |
| MoSe <sub>2</sub>                                  | nanosheet              | 70  | 182 | 69   | S12 |
| MoS <sub>2(1-x)</sub> Se <sub>2x</sub>             | monolayer              | -   | 273 | 100  | 10  |
| MoS <sub>2</sub>                                   |                        | -   | 381 | 99   |     |
| MoSe <sub>2</sub>                                  | nanosheet              | -   | 348 | 68   | S13 |
| Mo(S <sub>x</sub> Se <sub>1-x</sub> ) <sub>2</sub> |                        | -   | 271 | 57   |     |
| MoS <sub>2</sub>                                   |                        | -   | 219 | 91   |     |
| MoSe <sub>2</sub>                                  | nanoflake              | -   | 181 | 45   | 12  |
| MoS <sub>2(1-x)</sub> Se <sub>2x</sub>             |                        | -   | 164 | 48   |     |
| MoO <sub>3</sub> /MoS <sub>2</sub>                 | core-shell<br>nanowire | 150 | -   | 50   | S14 |
| MoS <sub>2</sub> /MoO <sub>2</sub>                 | porous<br>nanosheet    | 104 | -   | 76.1 | S15 |
| MoS <sub>2</sub> /MoO <sub>2</sub>                 | 3D<br>heterostructure  | 142 | -   | 35.6 | S16 |

---

---

|                         |            |     |   |      |     |
|-------------------------|------------|-----|---|------|-----|
| MoS <sub>2</sub> /rGO/P |            |     |   |      |     |
| PD/O-                   | 3D network | 90  | - | 48   | 3   |
| MWCNT                   |            |     |   |      |     |
| MoO <sub>2</sub> @N-    | nanosheet  | 156 | - | 47.5 | S17 |
| doped MoS <sub>2</sub>  |            |     |   |      |     |

---

## References

- S1 G. Kresse and J. Furthmuller, *Comput. Mater. Sci.*, 1996, **6**, 15.
- S2 G. Kresse and D. Joubert, *Phys. Rev. B*, 1999, **59**, 1758.
- S3 J. D. Pack and H. J. Monkhorst, *Phys. Rev. B*, 1977, **16**, 1748.
- S4 D. Voiry, H. Yamaguchi, J. Li, R. Silva, D. C. B. Alves, T. Fujita, M. Chen, T. Asefa, V. B. Shenoy, G. Eda and M. Chhowalla, *Nat. Mater.*, 2013, **12**, 850.
- S5 C. G. Van de Walle and J. Neugebauer, *J. Appl. Phys.*, 2004, **95**, 3851.
- S6 D. Voiry, M. Salehi, R. Silva, T. Fujita, M. Chen, T. Asefa, V. B. Shenoy, G. Eda and M. Chhowalla, *Nano Lett.*, 2013, **13**, 6222.
- S7 Z. Lu, H. Zhang, W. Zhu, X. Yu, Y. Kuang, Z. Chang, X. Lei and X. Sun, *Chem. Commun.*, 2013, **49**, 7516.

- S8 Y. Yu, S.-Y. Huang, Y. Li, S. N. Steinmann, W. Yang and L. Cao, *Nano Lett.*, 2014, **14**, 553.
- S9 D. Kong, H. Wang, J. J. Cha, M. Pasta, K. J. Koski, J. Yao and Y. Cui, *Nano Lett.*, 2013, **13**, 1341.
- S10 F. H. Saadi, A. I. Carim, J. M. Velazquez, J. H. Baricuatro, C. C. L. McCrory, M. P. Soriaga and N. S. Lewis, *ACS Catal.*, 2014, **4**, 2866.
- S11 X. Zhou, J. Jiang, T. Ding, J. Zhang, B. Pan, J. Zuo and Q. Yang, *Nanoscale*, 2014, **6**, 11046.
- S12 B. Qu, X. Yu, Y. Chen, C. Zhu, C. Li, Z. Yin and X. Zhang, *ACS Appl. Mater. Interfaces*, 2015, **7**, 14170.
- S13 B. Xia, L. An, D. Gao, S. Shi, P. Xi and D. Xue, *Crystengcomm*, 2015, **17**, 6420.
- S14 Z. B. Chen, D. Cummins, B. N. Reinecke, E. Clark, M. K. Sunkara and T. F. Jaramillo, *Nano. Lett.*, 2011, **11**, 4168.
- S15 L. J. Yang, W. J. Zhou, D. M. Hou, K. Zhou, G. Q. Li, Z. H. Tang, L. G. Li and S. W. Chen, *Nanoscale*, 2015, **7**, 5203.
- S16 R. D. Nikam, A. Y. Lu, P. A. Sonawane, U. R. Kumar, K. C. Yadav, L. J. Li and Y. T. Chen, *ACS Appl. Mater. Interfaces*, 2015, **7**, 23328.



S17 W. J. Zhou, D. M. Hou, Y. H. Sang, S. H. Yao, J. Zhou, G. Q. Li, L. G. Li, H. Liu  
and S. W. Chen, *J. Mater. Chem. A*, 2014, **2**, 11358.
